# Supplementary material for: Pulmonary arterial hypertension treatment with carvedilol for heart failure: a randomized controlled trial
Source: JCI journal article supplement (doi:10.1172/jci.insight.95240), 2017-08-16
Supplement: sd1 [file 1]

### Supplement/Table S1. PAH-specific medications among study groups

| PAH-specific therapies                                  | Placebo | Low-fixed dose<br>Carvedilol | Escalating-dose<br>Carvedilol |
|---------------------------------------------------------|---------|------------------------------|-------------------------------|
| <i>Phosphodiesterase type 5 inhibitor (PDE-5i) only</i> | 0       | 2                            | 1                             |
| <i>Soluble guanylate cyclase stimulator (sGC) only</i>  | 0       | 0                            | 0                             |
| <i>Endothelin receptor antagonist (ERA) only</i>        | 0       | 0                            | 0                             |
| <i>PDE-5i/sGC + ERA</i>                                 | 2       | 5                            | 3                             |
| <i>IV/SC prostacyclin only</i>                          | 2       | 0                            | 1                             |
| <i>Inhaled prostacyclin only</i>                        | 0       | 0                            | 0                             |
| <i>IV/SC prostacyclin + ERA</i>                         | 0       | 1                            | 1                             |
| <i>IV/SC prostacyclin + PDE-5i/sGC</i>                  | 2       | 1                            | 1                             |
| <i>IV/SC prostacyclin + PDE-5i/sGC + ERA</i>            | 3       | 0                            | 2                             |
| <i>Inhaled prostacyclin + ERA</i>                       | 0       | 0                            | 0                             |
| <i>Inhaled prostacyclin + PDE-5i/sGC</i>                | 0       | 0                            | 0                             |
| <i>Inhaled prostacyclin + PDE-5i/sGC + ERA</i>          | 0       | 1                            | 1                             |

### Supplement/Table S2. Comparison of PH subjects and Controls

| Variable                               | PH<br>N = 30    | Controls<br>N=12 | p-value <sup>A</sup> |
|----------------------------------------|-----------------|------------------|----------------------|
| <b>Baseline</b>                        |                 |                  |                      |
| Age (years)                            | 44 ± 12         | 42 ± 12          | 0.3                  |
| Race                                   |                 |                  | 0.5                  |
| Caucasian- n (%)                       | 23 (77%)        | 11 (72%)         |                      |
| African American- n (%)                | 6 (20%)         | 1 (8%)           |                      |
| Asian- n (%)                           | 1 (3%)          | 0 (0%)           |                      |
| Gender                                 |                 |                  | 0.4                  |
| Female- n (%)                          | 21 (70%)        | 10 (83%)         |                      |
| Male- n (%)                            | 9 (30%)         | 2 (17%)          |                      |
| Height (cm)                            | 167 ± 10        | 167 ± 6          | 0.5                  |
| Weight (kg)                            | 83 ± 20         | 71 ± 15          | 0.02                 |
| Temperature (F)                        | 97.3 ± 0.8      | 97.4 ± 0.7       | 0.3                  |
| Heart rate at rest (beats/min)         | 78 ± 7          | 69 ± 12          | 0.01                 |
| <b>Echocardiogram</b>                  |                 |                  |                      |
| LA area (cm <sup>2</sup> )             | 17 ± 3          | 16 ± 3           | 0.1                  |
| LVEF (%)                               | 59 ± 6          | 60 ± 5           | 0.4                  |
| RA area (cm <sup>2</sup> )             | 20 ± 6          | 15 ± 6           | <0.01                |
| RAP (mmHg)                             | 7 ± 4           | 6 ± 3            | 0.3                  |
| RVED area (cm <sup>2</sup> )           | 29 ± 9          | 18 ± 5           | <0.001               |
| RVES area (cm <sup>2</sup> )           | 21 ± 8          | 10 ± 3           | <0.001               |
| RVSP (mmHg)                            | 67 ± 27         | 26 ± 6           | <0.001               |
| RVFAC (%)                              | 29 ± 10         | 46 ± 7           | <0.001               |
| LV SV (ml)                             | 63 ± 18         | 63 ± 11          | 0.5                  |
| LV cardiac output (l/min)              | 4.8 ± 1.6       | 3.8 ± 0.7        | <0.01                |
| RV peak global longitudinal strain (%) | -16 ± 4         | -23 ± 4          | <0.001               |
| LV peak global longitudinal strain (%) | -18 ± 3         | -18 ± 2          | 0.4                  |
| NT-proBNP (pg/ml)                      | 90 (25, 498)    | 44 (22, 64)      | <0.01                |
| Urinary cAMP/creatinine (umol/g)       | 1.0 (0.5, 1.5)  | 1.2 (0.7, 1.4)   | 0.1                  |
| <b>Hypoxia-Inducible Pathways</b>      |                 |                  |                      |
| Erythropoietin (mIU/ml)                | 6.8 (4.2, 12.9) | 2.6 (1.8, 4.6)   | 0.02                 |
| Heart Glucose Uptake by FDG-PET scan   |                 |                  |                      |
| RV/LV ratio (SUV)                      | 0.8 (0.5, 1.4)  | 0.2 (0.2, 0.6)   | <0.01                |
| RV (SUV)                               | 3.8 (2.3, 6.0)  | 1.7 (1.3, 1.9)   | <0.001               |

Numerical variables are presented as mean ± standard deviation, or alternatively as median (25<sup>th</sup> percentile, 75<sup>th</sup> percentile) when distributions are substantially skewed.

<sup>A</sup>: Fisher exact for categorical values and T-test (one-sided) for quantitative values and in cases of skewed distributions, T-test was applied to log-transformed values.

**Supplement/Table S3. Adverse events in PAHTCH**

| Adverse event                          | Group           | Study week at which event occurred | Carvedilol Dose at time of event | Dose de-escalation | Final dose |
|----------------------------------------|-----------------|------------------------------------|----------------------------------|--------------------|------------|
| Fatigue/toe discoloration/vivid dreams | Low-fixed       | 12 weeks                           | 3.125 mg                         | Yes                | 0 mg       |
| Dyspnea/wheezing                       | Dose-escalating | 4 weeks                            | 25 mg                            | Yes                | 12.5 mg    |
| Cough/leg swelling                     | Dose-escalating | 3 weeks                            | 12.5 mg                          | Yes                | 6.25 mg    |
| Site infection/acute bronchitis        | Dose-escalating | 8 weeks                            | 6.25 mg                          | Yes                | 3.125 mg   |
| Leg swelling                           | Dose-escalating | 8 weeks                            | 25 mg                            | Yes                | 12.5 mg    |
| Chest pain                             | Low-fixed       | 18 weeks                           | 3.125 mg                         | No                 | 3.125 mg   |
| Bronchitis                             | Placebo         | 8 weeks                            | Placebo                          | No                 | Placebo    |
| Blurry vision                          | Dose-escalating | 8 weeks                            | 25 mg                            | No                 | 25 mg      |
| Cholecystitis                          | Dose-escalating | 12 weeks                           | 25 mg                            | No                 | 25 mg      |
| Dyspnea                                | Placebo         | 1 week                             | Placebo                          | No                 | Placebo    |
| Bloating                               | Low-fixed       | Run-in week                        | 3.125 mg                         | No                 | 3.125 mg   |
| Nausea/vomiting                        | Dose-escalating | 16 weeks                           | 25 mg                            | No                 | 25 mg      |
| Broken arm                             | Dose-escalating | 10 weeks                           | 25 mg                            | No                 | 25 mg      |
| Leg swelling                           | Dose-escalating | Run-in week                        | 3.125 mg                         | No                 | 3.125 mg   |
| Dizziness                              | Dose-escalating | 18 weeks                           | 3.125 mg                         | No                 | 3.125 mg   |

**Supplement/Table S4. Differences in outcomes measured among the three study groups at baseline, 3-month, and 6-month visits excluding subjects with functional class I**

|                                                                    | Placebo        | Low-fixed<br>Dose<br>Carvedilol | Escalating-<br>dose<br>Carvedilol | p-value <sup>A</sup> |
|--------------------------------------------------------------------|----------------|---------------------------------|-----------------------------------|----------------------|
| Variable                                                           | N = 9          | N = 7                           | N = 9                             |                      |
| <b>Baseline</b>                                                    |                |                                 |                                   |                      |
| Age (years)                                                        | 40 ± 13        | 43 ± 5                          | 54 ± 9                            | 0.02                 |
| Weight (kg)                                                        | 81 ± 13        | 83 ± 14                         | 92 ± 24                           | 0.4                  |
| Temperature (F)                                                    | 97.6 ± 0.5     | 97.3 ± 0.6                      | 97.5 ± 0.6                        | 0.5                  |
| Race (Caucasian/African American/Asian)                            | 6/3/0          | 5/2/0                           | 9/0/0                             | 0.2                  |
| Gender (M/F)                                                       | 2/7            | 4/3                             | 6/3                               | 0.9                  |
| Classification of pulmonary hypertension                           |                |                                 |                                   | 0.6                  |
| Pulmonary arterial hypertension – n (%)                            |                |                                 |                                   |                      |
| Idiopathic                                                         | 2 (22%)        | 2 (29%)                         | 4 (44%)                           |                      |
| Heritable                                                          | 4 (44%)        | 4 (57%)                         | 2 (22%)                           |                      |
| Associated                                                         | 2 (22%)        | 0                               | 2 (22%)                           |                      |
| Pulmonary hypertension due to lung diseases and/or hypoxia – n (%) | 0              | 1 (14%)                         | 0                                 |                      |
| Chronic thromboembolic pulmonary hypertension – n (%)              | 1 (11%)        | 0                               | 1 (11%)                           |                      |
| <b>6-minute walk test</b>                                          |                |                                 |                                   |                      |
| Distance walked (m)                                                | 437 ± 83       | 469 ± 98                        | 419 ± 153                         | 0.7                  |
| Oxygen saturation at 6 min (%)                                     | 89 ± 6         | 93 ± 4                          | 89 ± 6                            | 0.2                  |
| Heart rate at rest (beats/min)                                     | 83 ± 8         | 78 ± 5                          | 80 ± 8                            | 0.4                  |
| Heart rate at 6 min (beats/min)                                    | 110 ± 18       | 116 ± 26                        | 123 ± 13                          | 0.4                  |
| Heart rate 1 min post exercise (beats/min)                         | 100 ± 13       | 89 ± 11                         | 103 ± 15                          | 0.1                  |
| Heart rate recovery (beats/min)                                    | 9 ± 15         | 26 ± 22                         | 20 ± 15                           | 0.2                  |
| <b>Echocardiogram</b>                                              |                |                                 |                                   |                      |
| LA area (cm <sup>2</sup> )                                         | 17 ± 2         | 17 ± 3                          | 19 ± 4                            | 0.3                  |
| LVEF (%)                                                           | 61 ± 6         | 57 ± 9                          | 58 ± 6                            | 0.5                  |
| RA area (cm <sup>2</sup> )                                         | 18 ± 5         | 21 ± 8                          | 21 ± 7                            | 0.6                  |
| RAP (mmHg)                                                         | 6 ± 2          | 6 ± 4                           | 8 ± 6                             | 0.5                  |
| RVED area (cm <sup>2</sup> )                                       | 31 ± 7         | 26 ± 4                          | 31 ± 14                           | 0.6                  |
| RVES area (cm <sup>2</sup> )                                       | 22 ± 7         | 18 ± 6                          | 23 ± 12                           | 0.5                  |
| RVSP (mmHg)                                                        | 76 ± 23        | 51 ± 13                         | 66 ± 31                           | 0.1                  |
| RVFAC (%)                                                          | 28 ± 10        | 33 ± 12                         | 28 ± 9                            | 0.6                  |
| LV SV (ml)                                                         | 70 ± 19        | 66 ± 18                         | 57 ± 17                           | 0.3                  |
| LV cardiac output (l/min)                                          | 4.9 ± 1.8      | 5.8 ± 2.3                       | 4.5 ± 1.0                         | 0.4                  |
| RV peak global longitudinal strain (%)                             | -15 ± 5        | -17 ± 4                         | -16 ± 5                           | 0.8                  |
| LV peak global longitudinal strain (%)                             | -17 ± 3        | -18 ± 2                         | -18 ± 4                           | 0.9                  |
| NT-proBNP (pg/ml)                                                  | 170 (35, 498)  | 57 (22, 169)                    | 163 (19, 825)                     | 0.8                  |
| Heart glucose uptake by FDG-PET scan RV/LV ratio (SUV)             | 1.1 (0.9, 1.4) | 0.6 (0.5, 0.8)                  | 0.9 (0.5, 1.6)                    | 0.6                  |
| <b>At 3-month follow up</b>                                        |                |                                 |                                   |                      |
| Weight (kg)                                                        | 80.9 ± 12.2    | 82.7 ± 13.9                     | 92.0 ± 21.8                       | 0.4                  |
| Temperature (F)                                                    | 97.6 ± 0.7     | 96.9 ± 1.1                      | 96.9 ± 1                          | 0.2                  |
| <b>6-minute walk test</b>                                          |                |                                 |                                   |                      |
| Distance walked (m)                                                | 415 ± 88       | 490 ± 94                        | 415 ± 151                         | 0.4                  |
| Oxygen saturation at 6 min (%)                                     | 88 ± 6         | 94 ± 5                          | 90 ± 5                            | 0.1                  |
| Heart rate at rest (beats/min)                                     | 78 ± 10        | 69 ± 10                         | 69 ± 8 <sup>B</sup>               | 0.1                  |
| Heart rate at 6 min (beats/min)                                    | 103 ± 28       | 119 ± 29                        | 106 ± 17                          | 0.4                  |
| Heart rate 1 min post exercise (beats/min)                         | 92 ± 24        | 84 ± 11                         | 79 ± 13 <sup>B</sup>              | 0.3                  |
| Heart rate recovery (beats/min)                                    | 10 ± 23        | 35 ± 20                         | 27 ± 16                           | 0.05                 |
| <b>Echocardiogram</b>                                              |                |                                 |                                   |                      |
| LA area (cm <sup>2</sup> )                                         | 16 ± 3         | 17 ± 3                          | 21 ± 5                            | 0.05                 |
| LVEF (%)                                                           | 60 ± 5         | 62 ± 5                          | 63 ± 7                            | 0.7                  |
| RA area (cm <sup>2</sup> )                                         | 17 ± 5         | 21 ± 8                          | 21 ± 6                            | 0.4                  |
| RAP (mmHg)                                                         | 5 ± 0          | 6 ± 2                           | 9 ± 5                             | 0.08                 |
| RVED area (cm <sup>2</sup> )                                       | 31 ± 7         | 26 ± 5                          | 31 ± 14                           | 0.6                  |
| RVES area (cm <sup>2</sup> )                                       | 23 ± 8         | 17 ± 4                          | 23 ± 8                            | 0.2                  |
| RVSP (mmHg)                                                        | 76 ± 21        | 54 ± 7                          | 58 ± 23                           | 0.06                 |

|                                                        |                     |                     |                      |       |
|--------------------------------------------------------|---------------------|---------------------|----------------------|-------|
| RVFAC (%)                                              | 20 ± 7 <sup>B</sup> | 32 ± 9              | 28 ± 6               | <0.01 |
| LV SV (ml)                                             | 67 ± 13             | 75 ± 20             | 69 ± 12              | 0.6   |
| LV cardiac output (l/min)                              | 4.9 ± 1.2           | 4.8 ± 1.2           | 4.8 ± 1.2            | >0.9  |
| RV peak global longitudinal strain (%)                 | -14 ± 4             | -18 ± 4             | -17 ± 4              | 0.3   |
| LV peak global longitudinal strain (%)                 | -19 ± 3             | -18 ± 4             | -18 ± 2              | 0.9   |
| NT-proBNP (pg/ml)                                      | 245 (42, 571)       | 37 (30, 143)        | 195 (47, 1033)       | 0.3   |
| <b>At 6-month follow up</b>                            |                     |                     |                      |       |
| Weight (kg)                                            | 79.7 ± 11.5         | 83.5 ± 14.0         | 89.6 ± 19.6          | 0.4   |
| Temperature (F)                                        | 97.6 ± 0.4          | 97.4 ± 0.8          | 97.1 ± 1.1           | 0.5   |
| 6-minute walk test                                     |                     |                     |                      |       |
| Distance walked (m)                                    | 453 ± 59            | 469 ± 106           | 427 ± 142            | 0.8   |
| Oxygen saturation at 6 min (%)                         | 90 ± 3              | 91 ± 7              | 85 ± 8               | 0.2   |
| Heart rate at rest (beats/min)                         | 73 ± 10             | 73 ± 5 <sup>B</sup> | 73 ± 9               | 0.9   |
| Heart rate at 6 min (beats/min)                        | 116 ± 35            | 116 ± 18            | 114 ± 20             | 0.9   |
| Heart rate 1 min post exercise (beats/min)             | 93 ± 24             | 96 ± 14             | 84 ± 16              | 0.4   |
| Heart rate recovery (beats/min)                        | 23 ± 19             | 20 ± 23             | 30 ± 12 <sup>B</sup> | 0.6   |
| Echocardiogram                                         |                     |                     |                      |       |
| LA area (cm <sup>2</sup> )                             | 18 ± 3              | 17 ± 3              | 20 ± 3               | 0.06  |
| LVEF (%)                                               | 58 ± 6              | 61 ± 7              | 62 ± 6               | 0.5   |
| RA area (cm <sup>2</sup> )                             | 19 ± 4              | 19 ± 7              | 22 ± 5               | 0.5   |
| RAP (mmHg)                                             | 6 ± 2               | 6 ± 2               | 8 ± 4                | 0.1   |
| RVED area (cm <sup>2</sup> )                           | 29 ± 7              | 25 ± 5              | 31 ± 10              | 0.4   |
| RVES area (cm <sup>2</sup> )                           | 23 ± 5              | 17 ± 4              | 24 ± 9               | 0.2   |
| RVSP (mmHg)                                            | 66 ± 23             | 44 ± 17             | 64 ± 32              | 0.2   |
| RVFAC (%)                                              | 25 ± 9              | 30 ± 11             | 27 ± 11              | 0.6   |
| LV SV (ml)                                             | 63 ± 12             | 67 ± 21             | 70 ± 20              | 0.7   |
| LV cardiac output (l/min)                              | 4.5 ± 0.9           | 4.6 ± 1.7           | 5.0 ± 1.8            | 0.7   |
| RV peak global longitudinal strain (%)                 | -15 ± 4             | -18 ± 4             | -16 ± 4              | 0.4   |
| LV peak global longitudinal strain (%)                 | -14 ± 12            | -18 ± 3             | -19 ± 3              | 0.4   |
| NT-proBNP (pg/ml)                                      | 292 (58, 497)       | 55 (28, 127)        | 175 (54, 589)        | 0.4   |
| Heart glucose uptake by FDG-PET scan RV/LV ratio (SUV) | 0.8 (0.7, 1.1)      | 0.5 (0.3, 0.7)      | 0.8 (0.4, 1.0)       | 0.3   |

Numerical variables are presented as mean ± standard deviation, or alternatively as median (25<sup>th</sup> percentile, 75<sup>th</sup> percentile) when distributions are substantially skewed

<sup>A</sup>Fisher's exact or Chi-square for categorical values and ANOVA for quantitative values and in cases of skewed distributions, ANOVA was applied to log-transformed values.

Paired t-test with Bonferroni-adjusted significance for change compared to baseline <sup>B</sup>p < 0.025

## Supplemental Methods

### *Echocardiogram*

Doppler echocardiography was performed by a single well-experienced imaging specialist using validated methods that have been previously published (1). Right ventricular function was assessed via measurement of RV fractional area change (RVFAC), myocardial performance index of the RV, tricuspid annular plane systolic excursion (TAPSE), tissue Doppler-derived systolic velocity of the lateral tricuspid annulus, and longitudinal strain by 2-dimensional speckle tracking technique. The calculation of RVFAC was based on the following formula:  $\text{RVFAC (\%)} = (\text{RV end-diastolic area} - \text{RV end-systolic area}) / \text{RV end-diastolic area} \times 100$

*Two Dimensional (2D) Speckle –Tracking Echocardiography (STE)* was used for the evaluation of myocardial function (2-6). Strain values were determined for each segment (segmental strain) globally and regionally. Average RV peak global longitudinal strain or global strain, which refers to the average longitudinal strain value of all 6 segments of the myocardium, was assessed as a measure of right ventricular function over time of the study.

### *FDG-PET scan*

Cardiac FDG-PET scans were conducted on fasting patients at baseline and at months 3

and 6. All subjects fasted 8 h prior to and during the study; they were then injected with 370 MBq (10 mCi) FDG, and the scan was performed 1.5 h post-injection. Finger stick blood sugar was measured to assure fasting state (blood sugar < 120 mg/dl). Patient data was acquired using a clinical PET/CT scanner (Biograph mCT 128, Siemens Molecular Imaging, Hoffman Estates, IL) having time-of-flight capable PET detectors in four-ring configuration. First, a low-dose CT scan was acquired to provide an attenuation map for PET data corrections. Then, PET data were acquired in list mode for fifteen minutes. PET images were reconstructed using iterative 3D-OSEM time-of-flight algorithm with resolution modeling. Images were analyzed in a blinded fashion by a single nuclear medicine physician using an image fusion workstation (TrueD, Syngo MultiModality Workstation, Siemens Molecular Imaging ) with region-of-interest (ROI) measuring tools. Maximal standardized uptake values (SUV) were measured in the heart (right ventricle free wall, left ventricle free wall, and intraventricular septum).

#### *Erythropoietin levels*

Blood obtained from venipuncture was collected in Serum Separation Tubes (367986, Becton, Dickinson and Company, Franklin Lakes, NJ) and clotted for at least 30 minutes. Serum was isolated after centrifugation at 2000 g for 10 minutes and stored at -80°C. Human Erythropoietin Platinum ELISA Kit (BMS2035, eBioscience, San Diego, CA) was used to quantify serum erythropoietin concentrations.

### *Beta adrenergic receptor ( $\beta$ AR)*

The method for measuring  $\beta$ AR fluorescence intensity has been previously published (7). In brief, peripheral blood cells were stained with a custom-made alprenolol-biotin probe that consists of the  $\beta$ -blocker alprenolol covalently linked to biotin (Cell Mosaic, Worcester, MA). The alprenolol probe binding was detected by secondary reagent Streptavidin PE (eBioscience). Samples were run on an LSR II flow cytometer (BD). Data analysis was performed using FlowJo software (vX.0.7) (Tree Star, OR), and alprenolol binding was expressed as the median fluorescence intensity (MFI) of each cell subset.

### *Urinary cAMP*

Quantitative measures of urine samples were normalized by creatinine concentrations to account for differences in hydration and urine volume. Urinary creatinine levels were quantified on an Abbott Architect machine according to manufacturer's instructions. Urine samples were diluted 1000-fold, and cAMP was quantified using the CatchPoint cAMP Kit according to the manufacturer's protocol (Cat# R8089, Molecular Devices, Sunnyvale, CA).

### *NT-proBNP*

NT-proBNP was measured with an electrochemiluminescence immunoassay performed on a Roche Cobas e411 analyzer. Validation studies on pooled human samples show repeatability CV of < 5% and precision CV of < 5% (Roche Diagnostics, Indianapolis, IN).

#### References:

1. Saygin D HK, Farha S, Park M, Sharp J, Roach EC, Tang W.H. W, Thomas JD, Erzurum SC, Neumann DR, DiFilippo FP. Metabolic and Functional Evaluation of the Heart and Lungs in Pulmonary Hypertension by Gated 2-[18F]-Fluoro-2-deoxy-D-glucose Positron Emission Tomography *Pulmonary Circulation*. 2017.
2. Mor-Avi V, Lang RM, Badano LP, Belohlavek M, Cardim NM, Derumeaux G, Galderisi M, Marwick T, Nagueh SF, Sengupta PP, et al. Current and evolving echocardiographic techniques for the quantitative evaluation of cardiac mechanics: ASE/EAE consensus statement on methodology and indications endorsed by the Japanese Society of Echocardiography. *J Am Soc Echocardiogr*. 2011;24(3):277-313.
3. Pirat B, McCulloch ML, and Zoghbi WA. Evaluation of global and regional right ventricular systolic function in patients with pulmonary hypertension using a novel speckle tracking method. *Am J Cardiol*. 2006;98(5):699-704.
4. Puwanant S, Park M, Popovic ZB, Tang WH, Farha S, George D, Sharp J, Puntawangkoon J, Loyd JE, Erzurum SC, et al. Ventricular geometry, strain, and rotational mechanics in pulmonary hypertension. *Circulation*. 2010;121(2):259-66.
5. Rudski LG, Lai WW, Afilalo J, Hua L, Handschumacher MD, Chandrasekaran K, Solomon SD, Louie EK, and Schiller NB. Guidelines for the echocardiographic assessment of the right heart in adults: a report from the American Society of Echocardiography endorsed by the European Association of Echocardiography, a registered branch of the European Society of Cardiology, and the Canadian Society of Echocardiography. *J Am Soc Echocardiogr*. 2010;23(7):685-713; quiz 86-8.
6. Sachdev A, Villarraga HR, Frantz RP, McGoon MD, Hsiao JF, Maalouf JF, Ammash NM, McCully RB, Miller FA, Pellicka PA, et al. Right ventricular strain for prediction of survival in patients with pulmonary arterial hypertension. *Chest*. 2011;139(6):1299-309.
7. Rose JA, Wanner N, Cheong HI, Queisser K, Barrett P, Park M, Hite C, Naga Prasad SV, Erzurum S, and Asosingh K. Flow Cytometric Quantification of Peripheral Blood Cell beta-Adrenergic Receptor Density and Urinary Endothelial Cell-Derived Microparticles in Pulmonary Arterial Hypertension. *PLoS One*. 2016;11(6):e0156940.
